# Supplementary material for: Immunophenotyping of Circulating Leukocytes Reveal Non-specific Activation of Innate and Adaptive Immune Systems in Multi-System Inflammatory Syndrome of Childhood Temporally Associated with SARS-Cov-2 Infection: Descriptive Cohort Study
Source: Preprints.org preprint supplement (doi:10.20944/preprints202007.0252.v1), 2020-07-12
Supplement: Supplementary file 1 [file supplementary]

## ONLINE SUPPLEMENTARY MATERIAL

**Carter M, Fish M, Jennings A et al. Immunophenotyping of Circulating Leukocytes in Multi-system Inflammatory Syndrome of Childhood Temporally Associated with SARS-CoV-2 Infection: Descriptive cohort study.**

### eMETHODS

1. Enzyme Linked Immunosorbent Assays for antibody to SARS-CoV-2
2. SARS-CoV-2 pseudotyped virus neutralization assay.
3. Flow cytometry
4. Cytokine assays from acute serum

### eTABLES

**eTable-1: Comparison of definitions for the syndrome of hyperinflammation in children temporally associated with SARS-CoV-2.**

**eTable-2: Description of healthy control children.** Healthy control children were recruited from elective surgical lists for minor procedures.

**eTable-3: Modified pediatric SOFA Score.** Adapted from Matics et al.<sup>1</sup> and Shime et al.<sup>2</sup>  
Abbreviations: FiO<sub>2</sub>, fraction of inspired oxygen; MAP, mean arterial pressure; pSOFA, pediatric Sequential (Sepsis-related) Organ Failure Assessment; SpO<sub>2</sub>, peripheral oxygen saturation. \* PaO<sub>2</sub> measured in mmHg. SI conversion factors: To convert bilirubin to  $\mu\text{mol/L}$  multiply by 17.104; to convert creatinine to  $\mu\text{mol/L}$  multiply by 88.4; and platelet count to  $\times 10^9/\text{L}$ , multiply by 1.

**eTable-4: Antibody panels for flow cytometry analysis.**

**eTable-5: Characteristics of the study cohort by serological status to SARS-CoV-2.** \*2 children with asthma (1 with eczema and 1 with autistic spectrum disorder), 1 child with food allergy, 1 child with hemoglobin C trait, and 1 child with aplastic anemia and immunosuppression (ciclosporin). \*\*Variables adjusted by age group (see eTable-3<sup>1</sup>). \*\*\*1 patient treated with anakinra, 4 patients with infliximab and 10 patients with tocilizumab. \*\*\*\* Montreal Z-score<sup>3</sup>  $\geq 2$  on echocardiography or computed tomography. Primary end-point pneumonia was defined as per Cherian T et al<sup>4</sup>. Tachycardia was determined using thresholds developed for the UK National Institute of Health and Clinical Excellent *Guidelines for the Recognition and Management of Sepsis*.

**eTable-6: Description of previously published cohorts.** Published studies with  $\geq 5$  patients and unselected for presenting features, 30<sup>th</sup> June 2020.

### eFIGURES

**eFigure-1: Flow diagram of recruitment to the study cohort.**

**eFigure-2: Whole blood sampling time points relative to fever onset (A) and presentation to hospital (B) for flow cytometry in the study cohort.** Red bars refer to T1 (acute phase), orange bars refer to T2 (resolution phase) and green bars refer to T3 (convalescent phase). Samples for cytokine analysis were all taken prior to the administration of intravenous immunoglobulin.

**eFigure-3: Pseudoviral neutralization assay by serology to SARS-CoV-2.** This was undertaken on 24/25 children with MIS-C and who had serum samples available for analysis. The samples with some neutralization activity but seronegative status is most likely secondary to presence of IgM/IgA.

**eFigure-4: Clinical biomarkers in patients with MIS-C.** Serum ferritin concentrations (A) decreased from acute and resolution phases of illness (T1 and T2) into convalescence (normal range shown as dashed lines, 22–275 µg/L). Serum troponin T concentrations (B) were raised in the majority of children in the acute phase of illness and normalized by convalescence (upper threshold for acute myocardial infarction in adults shown as dashed line, 30 ng/L). Blood platelet count (C) increased significantly across time points from a relative thrombocytopenia in the acute phase to thrombocytosis by convalescence (normal range shown as dashed lines, 150–450 x 10<sup>9</sup>/L). Serum D-dimer concentrations (D) were elevated in the acute and resolution phases and returned towards normal (but still raised) in convalescence (upper threshold of normal shown as dashed line, 0.55 mg/L FEU).

**e-Figure 5: Additional information on Innate immune cell alterations on T1, T2 and T3.**

Innate alterations persist in PIMS-TS. Monocyte CD14 (TLR4 coreceptor) expression was significantly reduced compared to controls (A). Monocyte CD64 expression was increased at T1 (B). Classical monocyte proportions remained unchanged (C). Classical monocyte had significantly reduced CD86 expression (D). For boxplots the lowest whisker indicates the 1.5 times the interquartile range from the hinge; bottom border of the box, 25th percentile; line bisecting the shaded region of each box, median; top border of the box, 75th percentile; and highest whisker, 1.5 times the interquartile range from the hinge. Statistical analysis for boxplots was performed by Wilcoxon signed rank test. For correlations Spearman's rank was performed. Dots are coloured by serology to SARS-CoV-2 result; positive (red), negative (blue), hospital controls with no serology measure (black).

**eFigure-6: Additional information on T cell alterations on T1, T2 and T3.** Specific subsets of T cells are preferentially activated. The CD8+ T cell compartment was not activated. HLA-DR expression was measured on total CD8+ T cells (A), CD8+ CCR7- T cells (B), and CD8+ CCR7+ T cells (C). Proportion of CCR7+ subsets in CD8+ T cells (D) was raised in the acute phase. HLA-DR proportion of CD8+ CCR7+ T cells was approximately stable across cohorts / phases of disease (E). HLA-DR expression was measured on CD4+ CCR7- T cells (F) and did not change across cohorts / phases of disease. The proportion of CCR7+ CD4+ T cells (G), and the proportion of HLA-DR+ regulatory T cells (H) did not change across cohorts / phases of disease. For boxplots the lowest whisker indicates the 1.5 times the interquartile range from the hinge; bottom border of the box, 25th percentile; line bisecting the shaded region of each box, median; top border of the box, 75th percentile; and highest whisker, 1.5 times the interquartile range from the hinge. Statistical analysis for boxplots was performed by Wilcoxon signed rank test. For correlations Spearman's rank was performed. Dots are colored by serology to SARS-CoV-2 result; positive (red), negative (blue), hospital controls with no serology measure (black).

**eFigure-7: Epidemiology of SARS-Cov-2 infection in England prior to, and during the study period.** Cumulative (laboratory-confirmed) cases of infection with SARS-CoV-2 in regions of England during the study period, and in the period from 23<sup>rd</sup> March where severe UK-wide movement restrictions ("lockdown") were in place. Evelina London Children's Hospital is in central London and also provides tertiary immunology, infectious diseases, cardiology and intensive care to children in south-east England in collaboration with other tertiary centers (referred to "approximate catchment"). Data from the UK Government (<https://coronavirus.data.gov.uk/>) accessed on 22<sup>nd</sup> June 2020. "Index case" denotes the first case of PIMS-TS identified at Evelina London Children's Hospital, admitted at 14<sup>th</sup> April 2020<sup>5</sup>.

**eFigure-8: Innate immune cell panel and gating approach<sup>6</sup>.**

*Gating strategy used to examine absolute innate cell counts in Cytodelics-preserved human whole blood by flow cytometry.* A time gate was used to check data acquisition. A singlet gate was used to remove doublets. The green laser (FITC) was used to check the Precision Count beads (Biolegend). Cells were re-gated based on size (FSC vs SSC) to identify immune cells. CD14 expression was used to differentiate total monocytes (CD14+) from other immune cells (CD14-). Total monocytes were

further gated against CD16 to identify classical monocytes (CD14+/CD16-) and non-classical monocytes (CD14+/CD16+). From the CD14- cells, CD56 was plotted against HLA-DR to identify total dendritic cells (DCs) (HLA-DR+/CD56-) and natural killer (NK) cells (HLA-DR-/CD56+). Total DCs were further gated to identify plasmacytoid dendritic cells (pDCs) (HLA-DR+/CD123+) and myeloid dendritic cells (mDCs) (HLA-DR+/CD11c+). From the CD14- cells, cells were gated on CD15+ cells. CD15+ cells were further gated to identify CD16+ total neutrophils (CD14+/CD15+/CD16+). The MFI of CD64, CD10 and HLA-DR was used to assess neutrophil activation. The MFI of HLA-DR and CD86 was used to assess monocyte and DC activation.

**eFigure-9: T cell panel and gating approach<sup>6</sup>**

*Gating strategy used to examine absolute T cell counts in Cytodelics-preserved human whole blood by flow cytometry.* A time gate was used to check data acquisition. A singlet gate was used to remove doublets. The green laser (FITC) was used to check the Precision Count beads (Biolegend). Cells were re-gated based on size (FSC vs SSC) to identify lymphocytes. CD3 was used to identify T cells (CD3+). CD3 was plotted against the gamma delta TCR to distinguish gamma delta T cells from alpha beta T cells. Alpha beta T cells were further gated on CD4 and CD8 to identify CD4+ T cells (CD3+/CD4+) and CD8+ T cells (CD3+/CD8+). CD4+ T cells were further gated on CD25 and CD127 to identify total regulatory T cells (Tregs) (CD4+/CD25+/CD127-). CD4+ T cells were gated on CCR7 to identify CD4+/CCR7+ and CD4+/CCR7- T cells. The MFI of HLA-DR was used to assess activation of gamma delta T cells, total Tregs, CD4+/CCR7+ and CD4+/CCR7- cells.

**eFigure-10: B cell panel and gating approach<sup>6</sup>**

*Gating strategy used to examine absolute B cell counts in Cytodelics-preserved human whole blood by flow cytometry.* A time gate was used to check data acquisition. A singlet gate was used to remove doublets. The green laser (FITC) was used to check the Precision Count beads (Biolegend). CD19 was used to differentiate CD19+ total B cells from other immune cells. From total B cells, CD5 was used to identify CD5+ B cells (CD19+/CD5+). From total B cells CD24 was plotted against CD38 to identify transitional B cells (CD19+/CD24+/CD38+). From the non-transitional cells, CD27 was plotted against CD38 to identify plasmablasts (CD19+/CD27+/CD38+). From the non-plasmablasts, CD27 was plotted against IgM to identify naïve B cells (CD19+/IgM+/CD27-) and class-switched memory B cells (CD19+/IgM-/CD27+). From the IgM+/CD27+ cells, expression of IgD (MFI) was used to identify natural effector B cells (CD19+/IgM+/CD27+/IgD+). The MFI of HLA-DR was used to assess activation of total B cells, CD5+ B cells, naïve and natural effector B cells.

## eMethods

### 1. Enzyme Linked Immunosorbent Assays for antibody to SARS-CoV-2

#### *Protein expression*

N protein was obtained from the Leo James and Jakub Luptak at LMB, Cambridge. The N protein used is a truncated construct of the SARS-CoV-2 N protein comprising residues 48-365 (both ordered domains with the native linker) with an N terminal uncleavable hexahistidine tag. N was expressed in *E. Coli* using autoinducing media for 7h at 37°C and purified using immobilised metal affinity chromatography (IMAC), size exclusion and heparin chromatography.

S protein consists of a pre-fusion S ectodomain residues 1-1138 with proline substitutions at amino acid positions 986 and 987, a GGGG substitution at the furin cleavage site (amino acids 682-685) and an N terminal T4 trimerisation domain followed by a Strep-tag II [18]. The plasmid was obtained from Philip Brouwer, Marit van Gils and Rogier Sanders at The University of Amsterdam. The protein was expressed in 1 L HEK-293F cells (Invitrogen) grown in suspension at a density of 1.5 million cells/mL. The culture was transfected with 325 µg of DNA using PEI-Max (1 mg/mL, Polysciences) at a 1:3 ratio. Supernatant was harvested after 7 days and purified using StrepTactinXT Superflow high capacity 50% suspension according to the manufacturer's protocol by gravity flow (IBA Life Sciences).

The RBD plasmid was obtained from Florian Krammer at Mount Sinai University [19]. Here the natural N-terminal signal peptide of S is fused to the RBD sequence (319 to 541) and joined to a C-terminal hexahistidine tag. This protein was expressed in 500 mL HEK-293F cells (Invitrogen) at a density of 1.5 million cells/mL. The culture was transfected with 1000 µg of DNA using PEI-Max (1 mg/mL, Polysciences) at a 1:3 ratio. Supernatant was harvested after 7 days and purified using Ni-NTA agarose beads.

#### *Serology Analysis*

All sera were heat-inactivated at 56°C for 30 mins before use in the in-house ELISA. High-binding ELISA plates (Corning, 3690) were coated with antigen (N, S or RBD) at 3 µg/mL (25 µL per well) in PBS, either overnight at 4°C or 2 hr at 37°C. Wells were washed with PBS-T (PBS with 0.05% Tween-20) and then blocked with 100 µL 5% milk in PBS-T for 1 hr at room temperature. Wells were emptied and sera and plasma diluted at 1:50 and 1:25 respectively in milk were added and incubated for 2 hours at room temperature. Control reagents included CR3009 (2 µg/mL), CR3022 (0.2 µg/mL), negative control plasma (1:25 dilution), positive control plasma (1:50) and blank wells. Wells were washed with PBS-T. Secondary antibody was added and incubated for 1 hr at room temperature. IgM was detected using Goat-anti-human-IgM-HRP (1:1,000) (Sigma: A6907) and IgG was detected using Goat-anti-human-Fc-AP (1:1,000) (Jackson: 109-055-043-JIR). Wells were washed with PBS-T and either AP substrate (Sigma) was added and read at 405 nm (AP) or 1-step TMB substrate (Thermo Scientific) was added and quenched with 0.5 M H<sub>2</sub>SO<sub>4</sub> before reading at 450 nm (HRP).

### 2. SARS-CoV-2 pseudotyped virus neutralization assay.

#### *Virus preparation*

Pseudotyped HIV virus incorporating the SARS-Cov2 spike protein was expressed in a 10 cm dish seeded the day prior with 3.5 x 10<sup>6</sup> HEK293T/17 cells in 10 ml of complete Dulbecco's Modified Eagle's Medium (DMEM-C) containing 10% (vol/vol) foetal bovine serum (FBS), 100 IU/ml penicillin and 100 µg/ml streptomycin. Cells were transfected using 35 µg of PEI-Max (1 mg/mL, Polysciences) with: 1500 ng of HIV-luciferase plasmid, 1000 ng of HIV 8.91 gag/pol plasmid and 900 ng of SARS-2 spike protein plasmid (provided by Nigel Temperton).<sup>7</sup> The media was changed 18 hours post-transfection and supernatant was harvested 48 hours post-transfection. Virus particle was filtered through a 0.45µm filter and stored at -80°C.

### *Neutralization assays*

Serial dilutions of serum samples (heat inactivated at 56°C for 30mins) were prepared with DMEM media and incubated with pseudovirus for 1-hour at 37°C in 96-well plates. Next, Hela cells stably expressing the ACE2 receptor (provided by Dr James Voss, The Scripps Research Institute) were added and the plates were left for 72 hours. Infection level was assessed in lysed cells with the Bright-Glo luciferase kit (Promega), using a Victor™ X3 multilabel reader (Perkin Elmer). As seropositivity is based on IgG to N or S.

### **3. Flow cytometry**

#### *Whole blood stabilization*

Whole blood was collected on the Paediatric intensive care unit. 0.5ml was immediately mixed with 0.5ml Cytodelics Stabilizer buffer (1:1 ratio), incubated at room temperature for 10 minutes and stored at -80°C.

#### *Flow Cytometry and Acquisition*

Whole blood sample staining was done on using Cytodelics processing kit (Cytodelics AB, Stockholm, Sweden). Frozen blood samples were thawed for 1 minute at 37°C water bath by gently swirling. 200µl of blood was added for each panel (Innate, T cell, B cell) to a 96-well V-bottom plate and centrifuged at 2000rpm for 2mins (Centrifugation settings remain the same throughout). Cells were resuspended in 100µl of respective antibody cocktail and incubated at room temperature for 20 mins. All flow cytometry antibodies and concentrations used for whole blood surface staining can be found in Supplementary Table-4. 100µl of PBS (Gibco) was added to each well and the plate was centrifuged. Supernatant was removed and 200µl of fixative buffer (Cytodelics)(1:1 dilution of Fix Concentrate in Fix Diluent) was added. The plate was incubated at room temperature for 15mins, centrifuged and supernatant removed. Cells were resuspended in 200µl of lysis buffer (Cytodelics)(1:4 dilution of lysis buffer in distilled H<sub>2</sub>O) and incubated at room temperature for 15 mins. The plate was centrifuged, and supernatant removed. Cells were resuspended in 200µl wash buffer (Cytodelics)(1:5 dilution of wash buffer concentrate in distilled H<sub>2</sub>O) and centrifuged. The supernatant was removed, and cells were resuspended in 175 µl of sterile PBS. Prior to acquisition, 25µl of Precision Count Beads™ (Biolegend) were added to each sample. All samples were analyzed on a five laser BD Fortessa flow cytometer equipped with a BD High Throughput Sampler (HTS) with a flow rate of 1µl/second. Flow cytometer was set up using application settings by using cytometer set up and tracking beads (Becton Dickson).

#### *Flow Cytometry Data Analysis*

FCS files acquired using BD FACSDiva™ and analysed using FlowJo (10.6.2, Treestar). Gating strategies for all panels are outlined in eFigure2-4. Event counts and median fluorescent intensities were calculated using FlowJo for relevant markers on specific populations. Absolute cell counts using Biolegend Precision Count Beads™ were calculated using the following equation:

$$\text{Absolute cell count (cells/}\mu\text{l)} = \frac{(\text{Cell count} \times \text{Precision Count Beads}^{\text{TM}} \text{ volume})}{(\text{Precision Count Beads}^{\text{TM}} \text{ count} \times \text{whole blood volume})} \times \text{Bead concentration}$$

#### **4. Cytokine assays from acute serum**

Acute serum samples (pre-intravenous immunoglobulin administration) from 15/25 children recruited had cytokines measured. The following cytokines were measured: interleukin (IL) -2 receptor agonist, interferon-gamma, IL-10, IL-17, IL-1beta, IL-6, IL-8, tumor necrosis factor (TNF) alpha. Serum was initially diluted 1 : 2 in distilled water. We used the Ella 600-100 (R&D Systems) automated ELISA platform within ViaPath laboratories at King's College Hospital, London, UK. This performs a sandwich ELISA using a microfluidics Simple Plex cartridge. This immunoassay works by routing the sample through a microfluidic channel that binds the protein of interest. The unbound analyte is removed by washing, before a detection antibody is added. Because each channel has three Glass Nano Reactors (GNRs) coated with a capture antibody, a triplicate set of results are produced for each sample. Results were then generated using the manufacturer-calibrated standard curve.

## eTABLES

**eTable-1: Comparison of definitions for the syndrome of hyperinflammation in children temporally associated with SARS-CoV-2.**

|                                                                                                                                                                                                                                                                                                                                                                                                                                                                                                                                                                                                                                                                                                                                                                                                                                                                                                                                                                                                                                                                                                                                                                                                                                                                                                                      |
|----------------------------------------------------------------------------------------------------------------------------------------------------------------------------------------------------------------------------------------------------------------------------------------------------------------------------------------------------------------------------------------------------------------------------------------------------------------------------------------------------------------------------------------------------------------------------------------------------------------------------------------------------------------------------------------------------------------------------------------------------------------------------------------------------------------------------------------------------------------------------------------------------------------------------------------------------------------------------------------------------------------------------------------------------------------------------------------------------------------------------------------------------------------------------------------------------------------------------------------------------------------------------------------------------------------------|
| <p><b>Paediatric Inflammatory Multisite Syndrome Temporarily Associated with SARS-Cov-2 (PIMS-TS; RCPCH 2020)</b></p> <p>A child presenting with persistent fever, inflammation (neutrophilia, elevated CRP and lymphopenia) and evidence of single or multi-organ dysfunction (shock, cardiac, respiratory, renal, gastrointestinal or neurological disorder).<br/>This may include children meeting full or partial criteria for Kawasaki disease.<br/>Exclusion of any other microbial cause, including bacterial sepsis, staphylococcal or streptococcal shock syndromes, infections associated with myocarditis such as enterovirus (waiting for results of these investigations should not delay seeking expert advice).<br/>SARS-CoV-2 PCR testing may be positive or negative</p>                                                                                                                                                                                                                                                                                                                                                                                                                                                                                                                            |
| <p><b>Multisystem Inflammatory Syndrome in Children (MIS-C; CDC 2020)</b></p> <p>An individual aged &lt;21 years presenting with fever<sup>i</sup>, laboratory evidence of inflammation<sup>ii</sup>, and evidence of clinically severe illness requiring hospitalization, with multisystem (&gt;2) organ involvement (cardiac, renal, respiratory, hematologic, gastrointestinal, dermatologic or neurological);<br/>AND<br/>No alternative plausible diagnoses;<br/>AND<br/>Positive for current or recent SARS-CoV-2 infection by RT-PCR, serology, or antigen test; or COVID-19 exposure within the 4 weeks prior to the onset of symptoms<br/>i. Fever &gt;38.0°C for ≥24 hours, or report of subjective fever lasting ≥24 hours<br/>ii. Including, but not limited to, one or more of the following: an elevated C-reactive protein (CRP), erythrocyte sedimentation rate (ESR), fibrinogen, procalcitonin, d-dimer, ferritin, lactic acid dehydrogenase (LDH), or interleukin 6 (IL-6), elevated neutrophils, reduced lymphocytes and low albumin<br/>Additional comments<br/>Some individuals may fulfil full or partial criteria for Kawasaki disease but should be reported if they meet the case definition for MIS-C<br/>Consider MIS-C in any pediatric death with evidence of SARS-CoV-2 infection</p> |
| <p><b>Multisystem inflammatory syndrome in children and adolescents temporally related to COVID-19 (WHO 2020)</b></p> <p>Children and adolescents 0–19 years of age with fever &gt; 3 days<br/>AND two of the following:</p> <ul style="list-style-type: none"> <li>• Rash or bilateral non-purulent conjunctivitis or muco-cutaneous inflammation signs (oral, hands or feet).</li> <li>• Hypotension or shock.</li> <li>• Features of myocardial dysfunction, pericarditis, valvulitis, or coronary abnormalities (including ECHO findings or elevated Troponin/NT-proBNP),</li> <li>• Evidence of coagulopathy (by PT, PTT, elevated d-Dimers).</li> <li>• Acute gastrointestinal problems (diarrhea, vomiting, or abdominal pain).</li> </ul> <p>AND<br/>Elevated markers of inflammation such as ESR, C-reactive protein, or procalcitonin.<br/>AND<br/>No other obvious microbial cause of inflammation, including bacterial sepsis, staphylococcal or streptococcal shock syndromes.<br/>AND<br/>Evidence of COVID-19 (RT-PCR, antigen test or serology positive), or likely contact with patients with COVID-19.</p>                                                                                                                                                                                         |

**eTable-2: Description of healthy control children.**

| Characteristic                  | N = 7 children            |
|---------------------------------|---------------------------|
| Age (Years, Median; IQR; Range) | 11.7 (5.3–13.9; 4.9–14.9) |
| Girls (N; %)                    | 2 (29%)                   |
| Self-reported ethnicity         |                           |
| Asian (N; %)                    | 0                         |
| Black (N; %)                    | 3 (43%)                   |
| White (N; %)                    | 4 (57%)                   |
| Other (N; %)                    | 0                         |



**eTable-3: Modified paediatric SOFA Score.**

| Variables                                                    | Score |                 |                                 |                                                        |                                                         |
|--------------------------------------------------------------|-------|-----------------|---------------------------------|--------------------------------------------------------|---------------------------------------------------------|
|                                                              | 0     | 1               | 2                               | 3                                                      | 4                                                       |
| <b>Respiratory</b>                                           |       |                 |                                 |                                                        |                                                         |
| PaO <sub>2</sub> : FiO <sub>2</sub> or                       | ≥400  | 300-399         | 200-299                         | 100-199 With respiratory support                       | <100 With respiratory support                           |
| SpO <sub>2</sub> : FiO <sub>2</sub>                          | ≥292  | 264-291         | 221-264                         | 148-220 With respiratory support                       | <148 With respiratory support respiratory support       |
| <b>Coagulation</b>                                           |       |                 |                                 |                                                        |                                                         |
| Platelet count (×10 <sup>3</sup> /μL)                        | ≥150  | 100-149         | 50-99                           | 20-49                                                  | <20                                                     |
| <b>Hepatic</b>                                               |       |                 |                                 |                                                        |                                                         |
| Bilirubin (mg/dL)                                            | <1.2  | 1.2-1.9         | 2.0-5.9                         | 6.0-11.9                                               | >12                                                     |
| <b>Cardiovascular</b>                                        |       |                 |                                 |                                                        |                                                         |
| MAP by age group or vasoactive infusion (mm Hg or μg/kg/min) |       |                 |                                 |                                                        |                                                         |
| Inotropes                                                    | -     | Milrinone (any) | Dopamine ≤5 or dobutamine (any) | Dopamine ≥5 or epinephrine ≤0.1 or norepinephrine ≤0.1 | Dopamine ≥15 or epinephrine >0.1 or norepinephrine >0.1 |
| <1 month                                                     | ≥46   | <46             |                                 |                                                        |                                                         |
| 1-11 months                                                  | ≥55   | <55             |                                 |                                                        |                                                         |
| 12-23 months                                                 | ≥60   | <60             |                                 |                                                        |                                                         |
| 24-59 months                                                 | ≥62   | <62             |                                 |                                                        |                                                         |
| 60-143 months                                                | ≥65   | <65             |                                 |                                                        |                                                         |
| 144-216 months                                               | ≥67   | <67             |                                 |                                                        |                                                         |
| >216 months                                                  | ≥70   | <70             |                                 |                                                        |                                                         |
| <b>Neurologic</b>                                            |       |                 |                                 |                                                        |                                                         |
| Glasgow Coma Score                                           | 15    | 13-14           | 10-12                           | 6-9                                                    | <6                                                      |
| <b>Renal</b>                                                 |       |                 |                                 |                                                        |                                                         |
| Creatinine by age group (mg/dL)                              |       |                 |                                 |                                                        |                                                         |
| <1 month                                                     | <0.8  | 0.8-0.9         | 1.0-1.1                         | 1.2-1.5                                                | ≥1.6                                                    |
| 1-11 months                                                  | <0.3  | 0.3-0.4         | 0.5-0.7                         | 0.8-1.1                                                | ≥1.2                                                    |
| 12-23 months                                                 | <0.4  | 0.4-0.5         | 0.6-1.0                         | 1.1-1.4                                                | ≥1.5                                                    |
| 24-59 months                                                 | <0.6  | 0.6-0.8         | 0.9-1.5                         | 1.6-2.2                                                | ≥2.3                                                    |
| 60-143 months                                                | <0.7  | 0.7-1.0         | 1.1-1.7                         | 1.8-2.5                                                | ≥2.6                                                    |
| 144-216 months                                               | <1.0  | 1.0-1.6         | 1.7-2.8                         | 2.9-4.1                                                | ≥4.2                                                    |
| >216 months                                                  | <1.2  | 1.2-1.9         | 2.0-3.4                         | 3.5-4.9                                                | ≥5                                                      |

**eTable-4: Antibody panels for flow cytometry analysis**

| Panel  | Target             | Fluorophore | Clone      | Manufacturer | Cat. number | Volume/ 100ul |
|--------|--------------------|-------------|------------|--------------|-------------|---------------|
| Innate | CD15               | BV786       | HI98       | BD           | 563838      | 1.00          |
| Innate | CD14               | BV421       | M5E2       | BD           | 565283      | 1.00          |
| Innate | CD56               | BB515       | B159       | BD           | 564489      | 2.00          |
| Innate | CD86               | BUV737      | 2331       | BD           | 612784      | 1.00          |
| Innate | CD68               | PE-CF594    | Y1/82A     | BD           | 564944      | 1.00          |
| Innate | HLA-DR             | BV510       | G46-6      | BD           | 563083      | 1.00          |
| Innate | CD11c              | BV650       | B-ly6      | BD           | 563404      | 1.00          |
| Innate | CD123              | PerCP-Cy5.5 | 7G3        | BD           | 560904      | 1.00          |
| Innate | CD16               | Pe-Cy7      | 3G8        | BD           | 560918      | 1.00          |
| Innate | CD64               | AF700       | 10.1       | BD           | 561188      | 2.00          |
| Innate | CD161              | PE          |            | BD           | 556081      | 1.00          |
| Innate | CD10               | BUV395      | HI10a      | BD           | 563871      | 3.00          |
| Innate | CD19               | APC-Cy7     |            | BD           | 557791      | 1.00          |
| Innate | CD3                | APC-Cy7     | SK7        | BD           | 560176      | 1.00          |
| T cell | CD3                | BUV395      | SK7        | BD           | 564001      | 2.00          |
| T cell | CD4                | BV786       | SK3        | BD           | 563877      | 2.00          |
| T cell | CD8                | BV605       | SK1        | BD           | 564116      | 2.00          |
| T cell | $\gamma\delta$ TCR | PE-Cy7      | 11F2       | BD           | 655410      | 5.00          |
| T cell | CCR7 (CD197)       | BV421       | 2-L1-A     | BD           | 566743      | 2.00          |
| T cell | CCR4 (CD194)       | PE-CF594    | 1G1        | BD           | 565391      | 2.00          |
| T cell | CCR6 (CD196)       | BB515       | 11Ag       | BD           | 564479      | 2.00          |
| T cell | CD45RO             | PE          |            | BD           | 555493      | 5.00          |
| T cell | CD45RA             | APC         |            | BD           | 550855      | 5.00          |
| T cell | CXCR3 (CD183)      | BB700       | 1C6        | BD           | 566532      | 2.00          |
| T cell | CD25               | BV510       | M-A251     | BD           | 563352      | 2.00          |
| T cell | CD25               | BV510       | 2A3        | BD           | 740198      | 2.00          |
| T cell | HLA-DR             | APC-R700    | G46-6      | BD           | 565127      | 2.00          |
| T cell | CD127              | BUV737      | HIL-7R-M21 | BD           | 612794      | 2.00          |
| B cell | CD19               | BV711       | SJ25C1     | BD           | 563038      | 2.00          |
| B cell | CD27               | BV786       | L128       | BD           | 563327      | 2.00          |
| B cell | CD43               | BV421       | 1G10       | BD           | 562916      | 2.00          |
| B cell | CD24               | BUV395      | ML5        | BD           | 563818      | 2.00          |
| B cell | IgG                | APC         | G18-145    | BD           | 550931      | 5.00          |
| B cell | IgD                | BUV737      | IA6-2      | BD           | 612798      | 2.00          |
| B cell | IgM                | BB515       | G20-127    | BD           | 564622      | 2.00          |
| B cell | CD38               | PE          | HIT-2      | BD           | 555460      | 10.00         |
| B cell | CD5                | PE-Cy7      | L17F12     | BD           | 348810      | 2.00          |
| B cell | CD25               | APC-R700    | 2A3        | BD           | 565106      | 2.00          |
| B cell | HLA-DR             | BV510       | G46-6      | BD           | 563083      | 2.00          |

**eTable-5: Demographic and clinical characteristics of the MIS-C cohort by serology to SARS-Cov-2.**

| Characteristics                                                 | N = 25 patients           | SARS-Cov2 serology        |                            |
|-----------------------------------------------------------------|---------------------------|---------------------------|----------------------------|
|                                                                 |                           | Negative (N = 8)          | Positive (N = 17)          |
| Age (Years, Median; IQR; Range)                                 | 12.5 (7.7–14.4; 1.1–16.8) | 10.1 (3.9–12.9; 1.1–15.5) | 13.0 (11.5–15.6; 3.5–16.8) |
| Female (N; %)                                                   | 10 (40%)                  | 6 (75%)                   | 4 (24%)                    |
| Self-reported ethnicity                                         |                           |                           |                            |
| Asian (N; %)                                                    | 5 (20%)                   | 1 (13%)                   | 4 (24%)                    |
| Black (N; %)                                                    | 9 (36%)                   | 1 (13%)                   | 8 (47%)                    |
| White (N; %)                                                    | 10 (40%)                  | 5 (63%)                   | 5 (29%)                    |
| Other (N; %)                                                    | 1 (4%)                    | 1 (13%)                   | 0                          |
| Comorbidity (N; %)*                                             | 5 (20%)                   | 3 (38%)                   | 2 (12%)                    |
| Clinical features at presentation                               |                           |                           |                            |
| Duration of fever prior to hospitalisation (Median; IQR; Range) | 5 (4–5; 0–9)              | 5 (3.3–5.3; 0–7)          | 5 (4–5; 2–9)               |
| Patients meeting classical Kawasaki disease criteria (N; %)     | 3 (12%)                   | 2 (25%)                   | 1 (6%)                     |
| Oral mucocutaneous involvement (N; %)                           | 6 (24%)                   | 4 (50%)                   | 2 (12%)                    |
| Bilateral non-purulent conjunctivitis (N; %)                    | 10 (40%)                  | 3 (38%)                   | 7 (41%)                    |
| Polymorphous non-blanching rash (N; %)                          | 12 (48%)                  | 6 (75%)                   | 6 (35%)                    |
| Erythema or oedema of hands or feet (N; %)                      | 5 (20%)                   | 3 (38%)                   | 2 (12%)                    |
| Periungual desquamation (N; %)                                  | 1 (4%)                    | 0                         | 0                          |
| Cervical lymphadenopathy (N; %)                                 | 4 (16%)                   | 1 (13%)                   | 3 (18%)                    |
| Respiratory distress (N; %)                                     | 4 (16%)                   | 1 (13%)                   | 3 (18%)                    |
| Tachycardia (N; %)                                              | 6 (24%)                   | 2 (25%)                   | 4 (24%)                    |
| Gastrointestinal symptoms (N; %)                                | 18 (72%)                  | 4 (50%)                   | 14 (82%)                   |
| SOFA score at presentation (Median; IQR; Range)**               | 2 (1–3; 0–6)              | 1 (1–2.3; 1–6)            | 2 (2–3; 0–6)               |
| Worst SOFA score (Median; IQR; Range)**                         | 2 (1–5; 1–8)              | 1 (1–2.3; 1–8)            | 3 (2–5; 1–6)               |
| Additional findings during admission                            |                           |                           |                            |
| Primary endpoint pneumonia (N; %)                               | 7 (28%)                   | 1 (13%)                   | 6 (35%)                    |
| Worst coronary artery Z-score (Median; IQR; Range)              | 1.6 (0.7–2.2; -2.0–4.6)   | 1.3 (0.9–1.5; -2.0–1.8)   | 1.7 (0.6–3.0; -0.8–4.6)    |

|                                                                   |                   |                     |                   |
|-------------------------------------------------------------------|-------------------|---------------------|-------------------|
| Worst left ventricular fractional shortening (Median; IQR; Range) | 27 (23–36; 15–47) | 39 (36–41; 33–47)   | 25 (21–27; 15–44) |
| Treatments during admission                                       |                   |                     |                   |
| PICU admission (N; %)                                             | 19 (82%)          | 6 (75%)             | 15 (88%)          |
| Mechanical ventilation (N; %)                                     | 2 (8%)            | 1 (13%)             | 1 (6%)            |
| Vasoactive infusion (N; %)                                        | 14 (56%)          | 2 (25%)             | 12 (71%)          |
| High dose corticosteroids (N; %)                                  | 21 (84%)          | 5 (63%)             | 16 (94%)          |
| Intravenous immunoglobulin (N; %)                                 | 23 (92%)          | 7 (88%)             | 16 (94%)          |
| Biologic immunomodulation (N; %) <sup>***</sup>                   | 15 (60%)          | 2 (25%)             | 13 (76%)          |
| Outcome                                                           |                   |                     |                   |
| PICU length of stay (Days; Median; IQR; Range)                    | 3 (1–5; 0–19)     | 1.5 (0.8–2.8; 0–19) | 4 (2.0–5.0; 0–10) |
| Hospital length of stay (Days; Median; IQR; Range)                | 8 (6–10, 2–25)    | 6 (5–7; 2–25)       | 8 (8–11; 5–14)    |
| Presence of coronary artery aneurysms (N; %)                      | 7 (28%)           | 0                   | 7 (41%)           |
| Myocardial infarction (N; %)                                      | 1 (4%)            | 0                   | 1 (6%)            |
| Pulmonary embolus or other significant thrombus (N; %)            | 2 (7%)            | 1 (13%)             | 1 (6%)            |
| Significant acute mental health diagnosis (N; %)                  | 1 (4%)            | 1 (13%)             | 0                 |
| SARS-Cov-2 PCR positive (N; %)                                    | 1 (4%)            | 0                   | 1 (6%)            |
| SARS-Cov-2 IgG antibody positive (N; %)                           | 17 (68%)          | –                   | –                 |

| Reference                                        | Riphagen et al. <sup>5</sup> | Verdoni et al. <sup>8</sup> | Belhadjer et al. <sup>9</sup> | Toubiana et al. <sup>10</sup> | Whittaker et al. <sup>11</sup> | Kaushik et al. <sup>12</sup> | Chiotis et al.      | Capone et al. <sup>13</sup> | Dufort et al. <sup>14</sup> | Feldstein et al. <sup>15</sup> |
|--------------------------------------------------|------------------------------|-----------------------------|-------------------------------|-------------------------------|--------------------------------|------------------------------|---------------------|-----------------------------|-----------------------------|--------------------------------|
| Number of patients                               | 8                            | 10                          | 35                            | 21                            | 58                             | 33                           | 6                   | 33                          | 99                          | 186                            |
| Setting                                          | PICU                         | Hospital                    | PICUs                         | University Hospital           | University Hospitals           | University Hospitals         | University Hospital | University Hospital         | General hospitals           | Health Centers                 |
| Location                                         | London, UK                   | Bergamo, Italy              | France and Switzerland        | Paris, France                 | UK                             | New York City, USA           | Philadelphia, USA   | New York City, USA          | New York State, USA         | 26 states, USA                 |
| Age (Median; IQR)                                | 8 (6–12.3)                   | 7.3 (2.9–8.1)               | 10                            | 7.9 (3.7–16.6)                | 9 (5.7–14)                     | 10 (6–13)                    | 7.5 (5.3–11.3)      | 8.6 (5.5–12.6)              | 68% aged 6–20 years         | 74% aged 5–20 years            |
| Female sex                                       | 3 (38%)                      | 3 (30%)                     | 17 (49%)                      | 12 (57%)                      | 33 (57%)                       | 13 (39%)                     | 5 (83%)             | 13 (39%)                    | 46 (46%)                    | 71 (38%)                       |
| Ethnicity*                                       |                              |                             |                               |                               |                                |                              |                     |                             |                             |                                |
| Asian (N; %)                                     | 2 (25%)                      | –                           | –                             | 6 (15%)                       | 18 (31%)                       | 1 (3%)                       | 0                   | 3 (9%)                      | 4/78 (5%)                   | –                              |
| Black (N; %)                                     | 6 (75%)                      | –                           | –                             | 24 (57%)                      | 22 (38%)                       | 13 (39%)                     | 2 (33%)             | 8 (24%)                     | 31/78 (40%)                 | 46 (25%)                       |
| White (N; %)                                     | 0                            | –                           | –                             | 12 (29%)                      | 12 (21%)                       | 3 (9%)                       | 2 (33%)             | 3 (9%)                      | 29/78 (37%)                 | 92 (49%)                       |
| Other (N; %)                                     | 0                            | –                           | –                             | –                             | 6 (10%)                        | 16 (48%)                     | 2 (33%)             | 19 (57%)                    | 14/78 (18%)                 | 50 (27%)                       |
| Clinical features at presentation                |                              | ***                         |                               |                               |                                |                              |                     | ****                        |                             |                                |
| Duration of prior fever (Median; IQR; Range)     | 4 (4–5)                      | –                           | –                             | 5 (0–12)                      |                                | 4.5 (3–6)                    | –                   | 4 (3–5)                     | 4 (3–6)                     | 6 (5–8)                        |
| Abdominal pain (N; %)                            | 6 (75%)                      | –                           | –                             | –                             | 31 (53%)                       | 21 (63%)                     | 5 (83%)             | –                           | 60 (61%)                    | –                              |
| Diarrhea (N;%)                                   | 7 (88%)                      | –                           | –                             | –                             | 30 (52%)                       | 16 (48%)                     | 4 (67%)             | –                           | 49 (49%)                    | –                              |
| Vomiting (N; %)                                  | 3 (38%)                      | –                           | –                             | –                             | 26 (45%)                       | 23 (69%)                     | –                   | –                           | 57 (58%)                    | –                              |
| Gastrointestinal symptoms                        | –                            | –                           | 29 (83%)                      | 21 (100%)                     | –                              | –                            | –                   | 32 (97%)                    | 79 (80%)                    | ~92%****                       |
| Oral mucocutaneous involvement (N; %)            | –                            | –                           | –                             | 16 (76%)                      | 17 (29%)                       | 7 (21%)                      | 3 (50%)             | –                           | 27 (27%)                    | 78 (42%)                       |
| Bilateral non-purulent conjunctivitis (N; %)     | 5 (63%)                      | –                           | –                             | 17 (81%)                      | 26 (45%)                       | 12 (36%)                     | 2 (33%)             | –                           | 55 (56%)                    | 103 (55%)                      |
| Polymorphous non-blanching rash (N; %)           | 4 (50%)                      | –                           | 20 (57%)                      | 16 (76%)                      | 30 (52%)                       | 14 (42%)                     | 2 (33%)             | –                           | 59 (60%)                    | 110 (59%)                      |
| Erythema or oedema of hands or feet (N; %)       | –                            | –                           | –                             | 10 (48%)                      | 9 (16%)                        | –                            | 2 (33%)             | –                           | 9 (9%)                      | 69 (37%)                       |
| Periungual desquamation (N; %)                   | –                            | –                           | –                             | –                             | –                              | –                            | –                   | –                           | –                           | –                              |
| Cervical lymphadenopathy (N; %)                  | –                            | –                           | 21 (60%)                      | 12 (57%)                      | 9 (16%)                        | –                            | 0                   | –                           | 6 (6%)                      | 18 (10%)                       |
| Respiratory symptoms (N; %)                      | 1 (13%)                      | 5 (50%)                     | 23 (65%)                      | –                             | 12 (21%)                       | 11 (33%)                     | 4 (67%)             | 17 (52%)                    | 40 (40%)                    | ~44%*****                      |
| Treatments during admission                      |                              |                             |                               |                               |                                |                              |                     |                             |                             |                                |
| Mechanical ventilation                           | 5 (63%)                      | 0                           | 22 (62%)                      | 11 (52%)                      | 25 (43%)                       | 5 (15%)                      | 3 (50%)             | 6 (18%)                     | 10 (10%)                    | –                              |
| Vasoactive infusion                              | 8 (100%)                     | 2 (20%)                     | 28 (80%)                      | 15 (71%)                      | 27 (47%)                       | 17 (51%)                     | 5 (83%)             | 25 (76%)                    | 61 (62%)                    | –                              |
| High dose corticosteroids                        | 5 (63%)                      | 8 (80%)                     | 12 (34%)                      | 10 (48%)                      | 37 (64%)                       | 17 (51%)                     | 5 (83%)             | 23 (70%)                    | 63 (64%)                    | 91 (49%)                       |
| Intravenous immunoglobulin                       | 8 (100%)                     | 10(100%)                    | 25 (71%)                      | 21 (100%)                     | 41 (71%)                       | 18 (54%)                     | 6 (100%)            | 33 (100%)                   | 69 (70%)                    | 144 (77%)                      |
| Biologic immunomodulation                        | 1 (13%)                      | 0                           | 3 (8%)                        | 0                             | 11 (19%)                       | 16 (48%)                     | 0                   | 8 (24%)                     | –                           | 38 (20%)                       |
| Additional findings and outcomes                 |                              |                             |                               |                               |                                |                              |                     |                             |                             |                                |
| Cardiac dysfunction/myocarditis                  | 8 (100%)                     | 6 (60%)                     | 28 (80%)                      | 16 (76%)                      | 29 (50%)                       | 21 (65%)                     | 4 (67%)             | 19 (58%)                    | 52 (53%)                    | 150 (80%)                      |
| Coronary art. aneurysms (Z-score >2/qualitative) | 1 (13%)                      | 2 (20%)                     | 6 (17%)                       | 5 (24%)                       | 8 (14%)                        | 2 (6%)                       | 1 (13%)             | 5 (15%)                     | 9 (9%)                      | 15 (8%)                        |
| Death                                            | 1 (13%)                      | 0                           | 0                             | 0                             | 1 (2%)                         | 0                            | 0                   | 0                           | 2 (2%)                      | 4 (2%)                         |
| SARS-CoV-2 PCR positive                          | 2 (25%)                      | 2 (20%)                     | 12 (35%)                      | 0                             | 15 (26%)                       | 11 (33%)                     | 3 (50%)             | 9 (27%)                     | 50/98 (51%)                 | 73 (56%)                       |
| SARS-CoV-2 serology positive                     | –                            | 8 (80%)                     | 30 (86%)                      | 19 (91%)                      | 40/46 (81%)**                  | 27 (81%)                     | 5 (83%)             | 30 (91%)                    | 76/77 (99%)                 | 58 (44%)                       |

\*Varying definitions of ethnicity. \*\*Serology not done in all patients; in total 45 (78%) patients had PCR or serological evidence of SARS-CoV-2 infection. \*\*\*5 (50%) patients with classic Kawasaki disease, 5 (50%) with incomplete disease. \*\*\*\*21 (64%) patients with classic Kawasaki disease. \*\*\*\*\* Proportions presented graphically.

**eTable-6: Description of previously published cohorts.**

eFIGURES

eFigure-1: Flow diagram of recruitment to the study cohort.

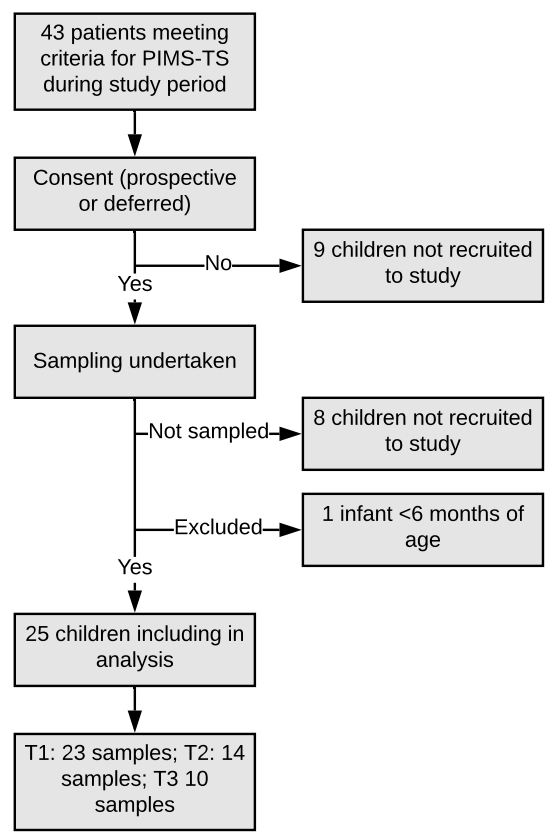

eFigure-2: Sampling time points relative to fever onset (A) and presentation to hospital (B).

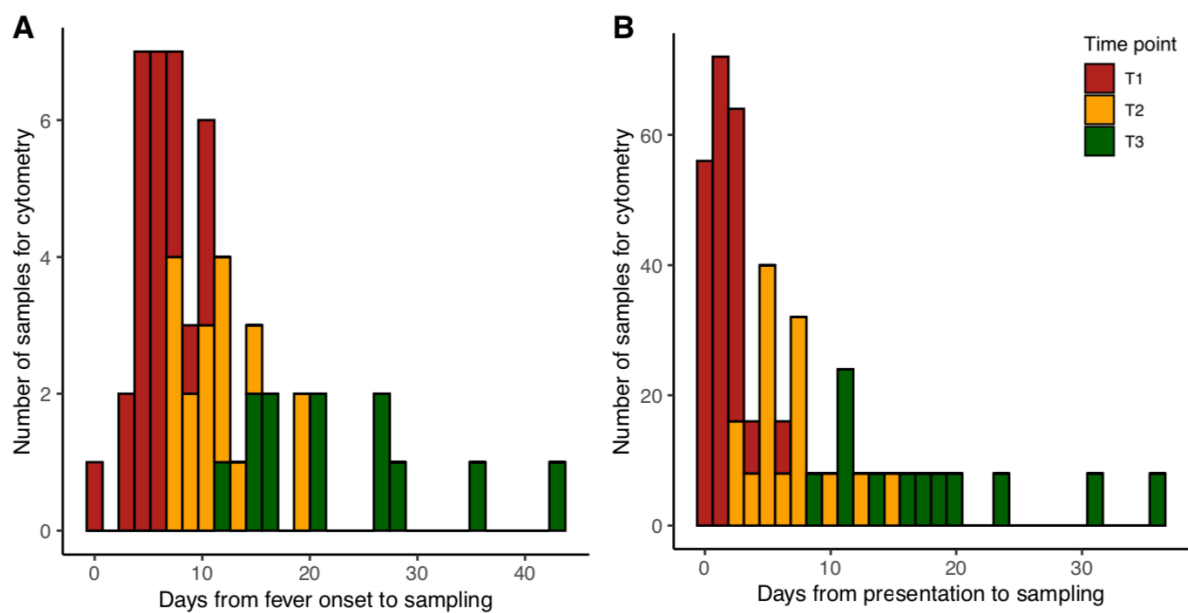

**eFigure-3: Pseudoviral neutralization assay results by serology status to SARS-CoV-2.**

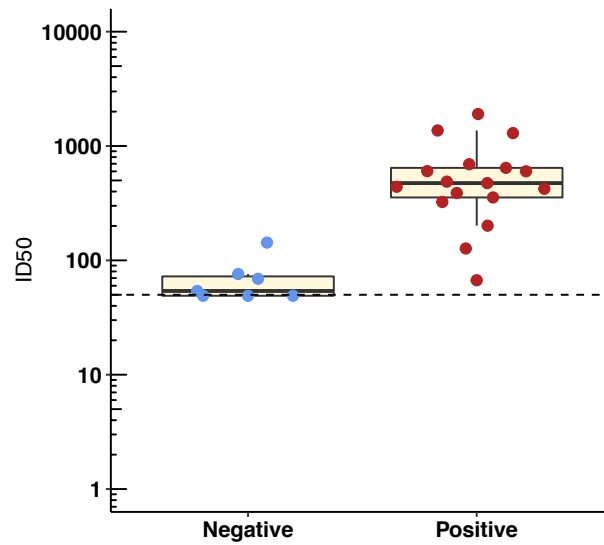

**e-Figure 4: Additional clinical biomarkers in patients with MIS-C.**

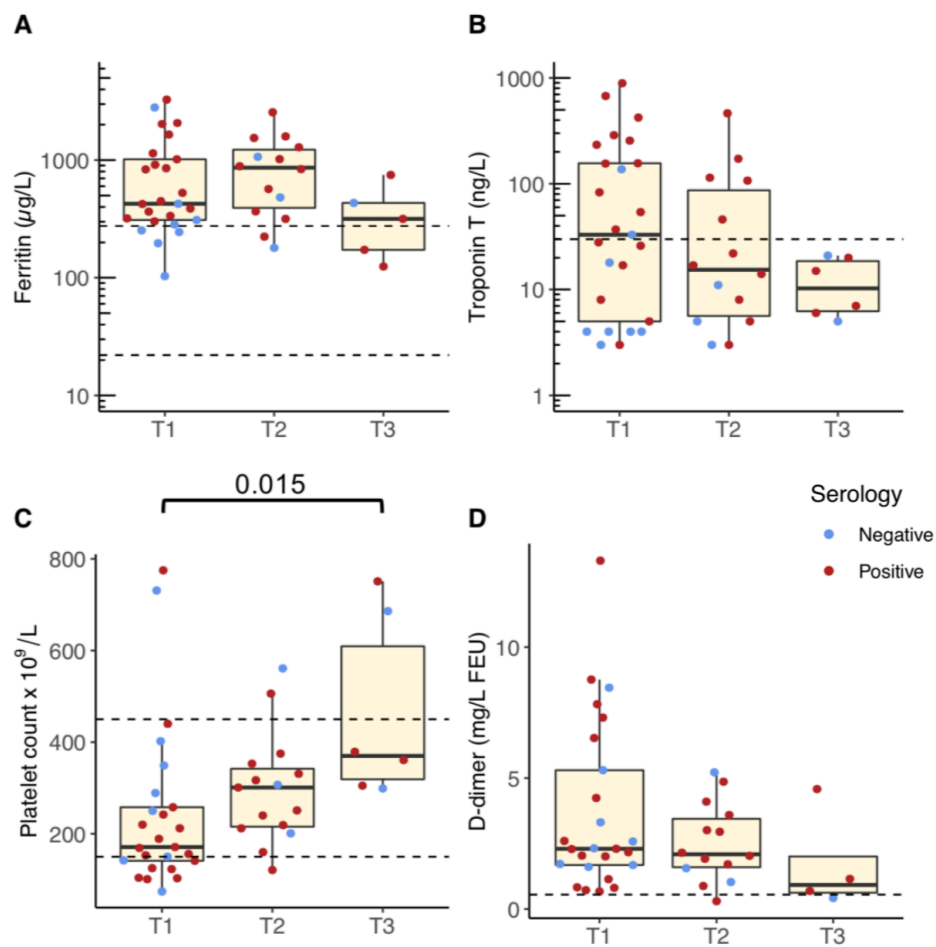

**e-Figure 5: Additional information on innate immune cell alterations in T1, T2 and T3.**

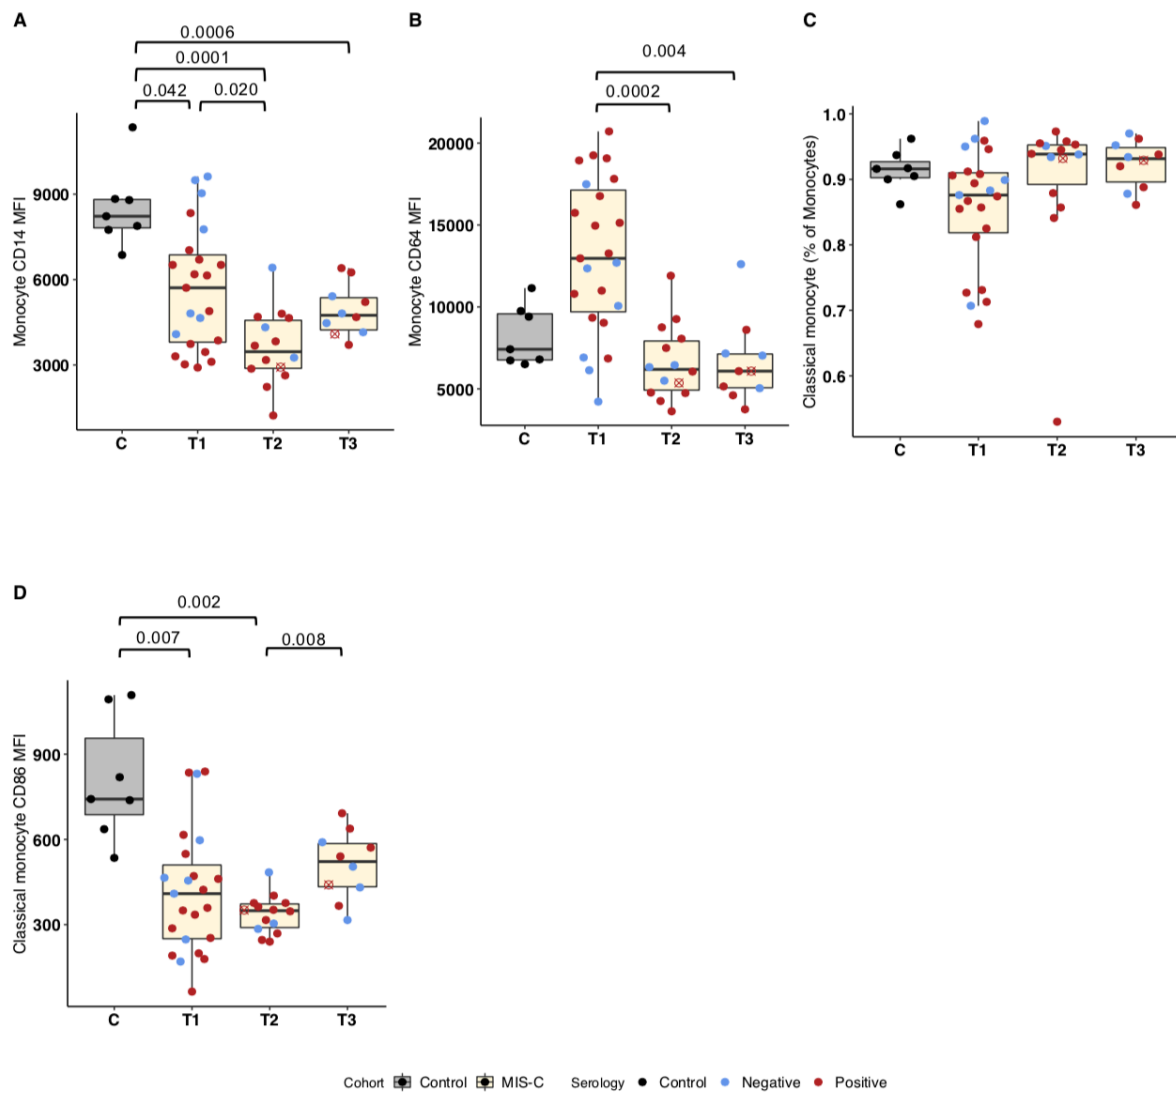



eFigure-6: Additional information on T cell alterations on T1, T2 and T3.

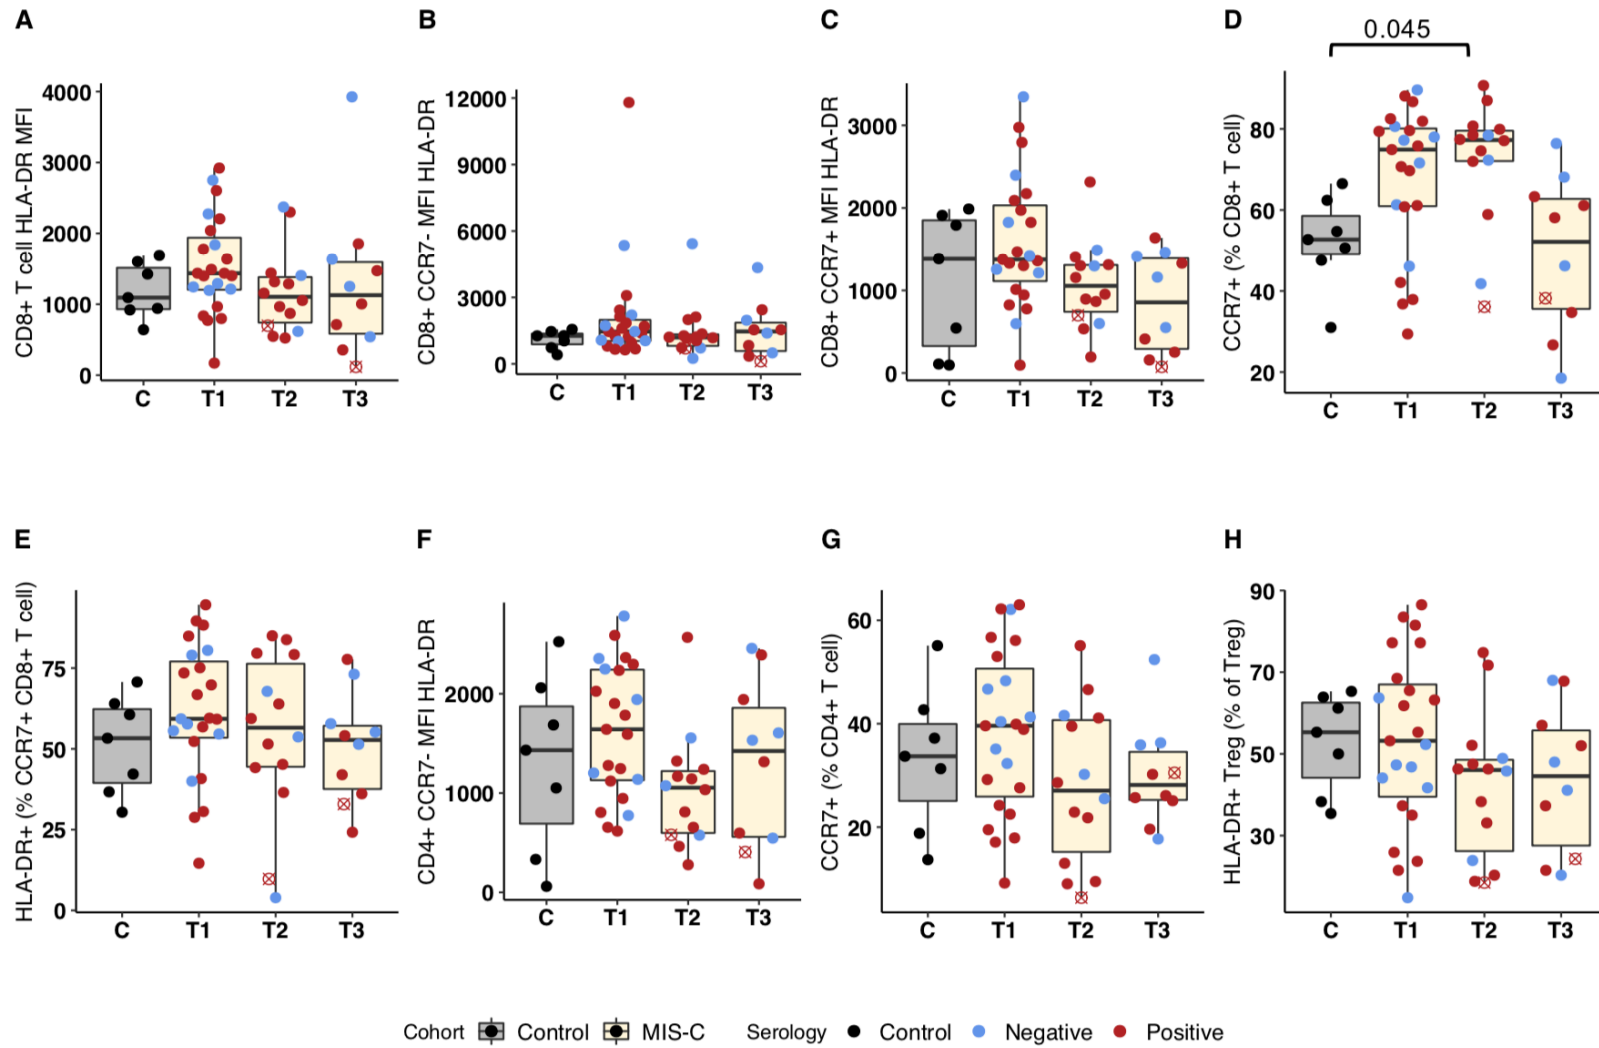

**eFigure-7: Epidemiology of SARS-Cov-2 infection in England prior to, and during the study period.**

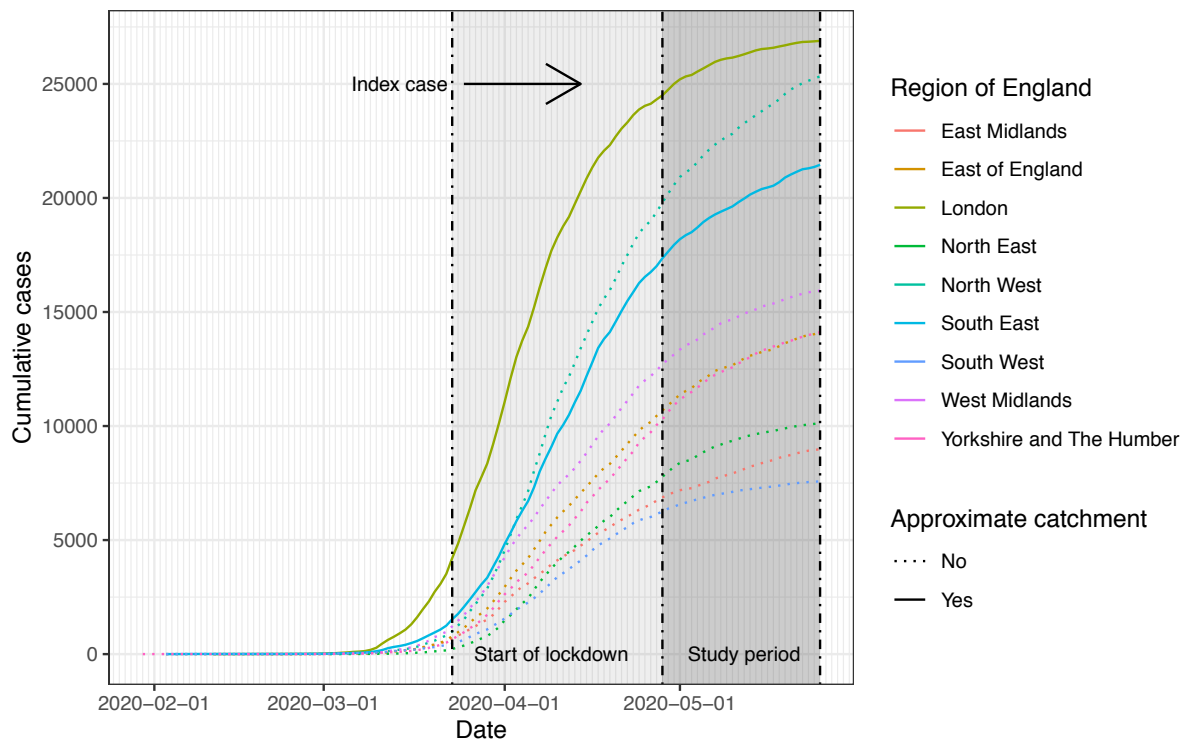

**eFigure-8: Innate immune cell panel and gating approach<sup>6</sup>.** Gating strategy used to examine absolute innate cell counts in Cytodelics-preserved human whole blood by flow cytometry.

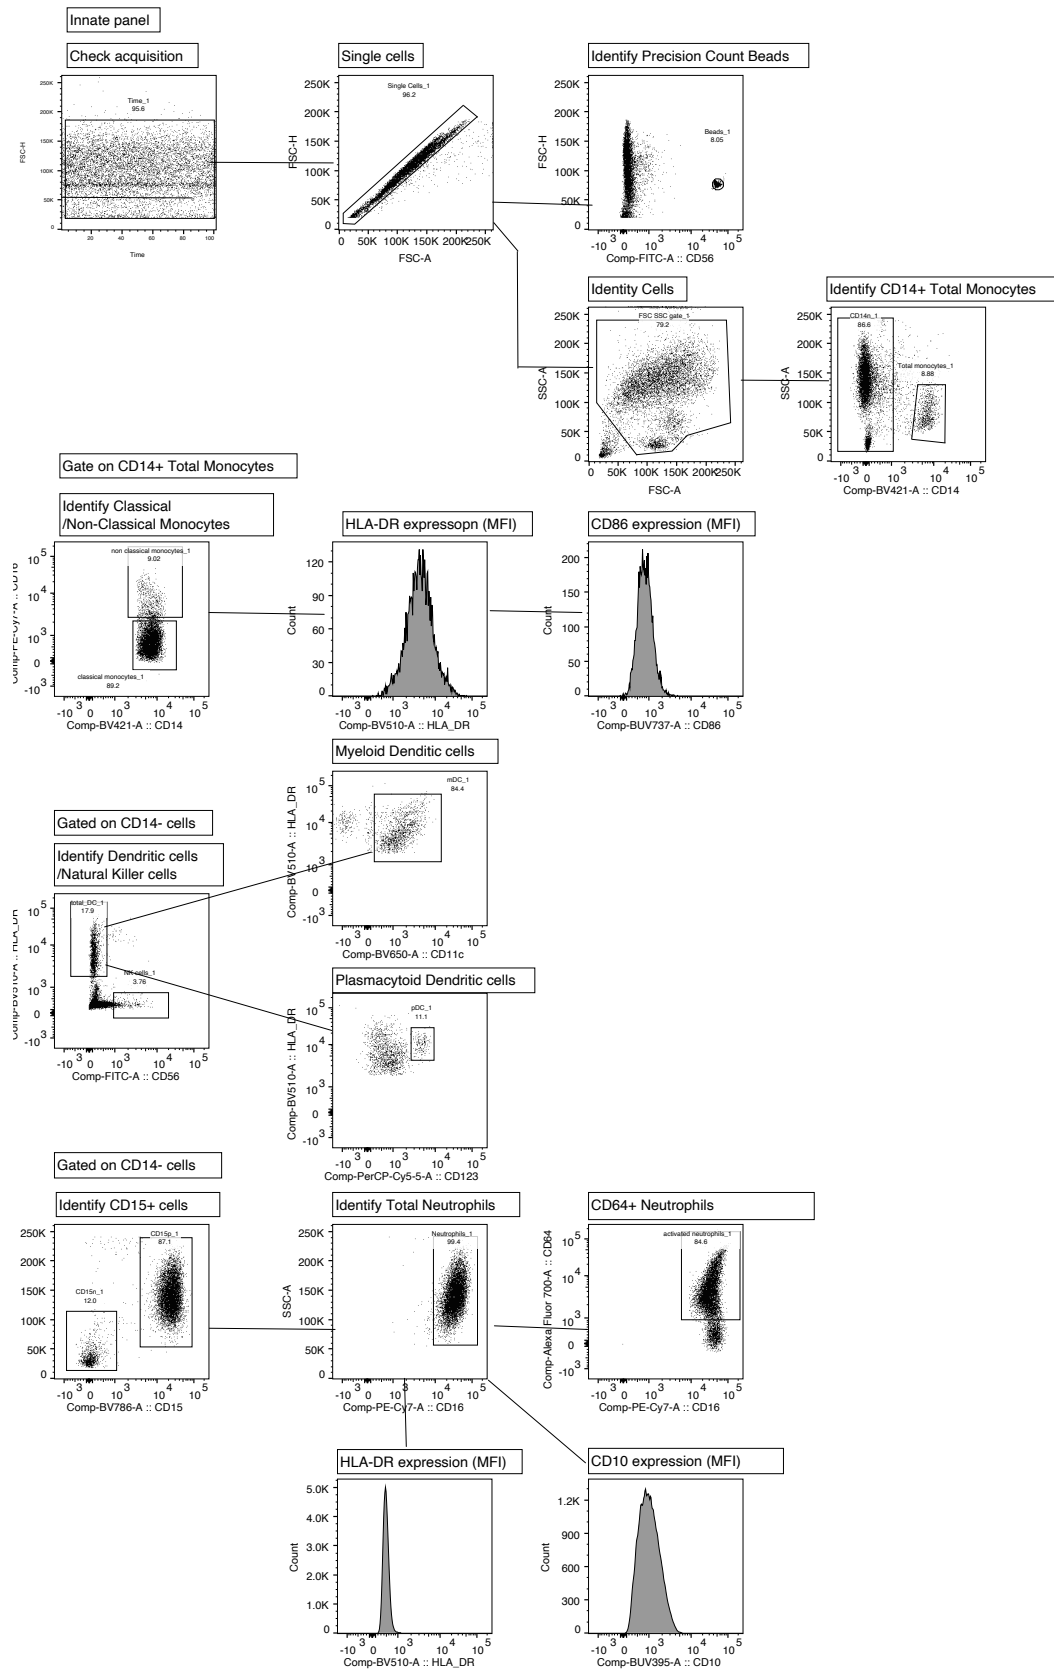

**eFigure-9: T cell panel and gating approach<sup>6</sup>** Gating strategy used to examine absolute T cell counts in Cytodelics-preserved human whole blood by flow cytometry.

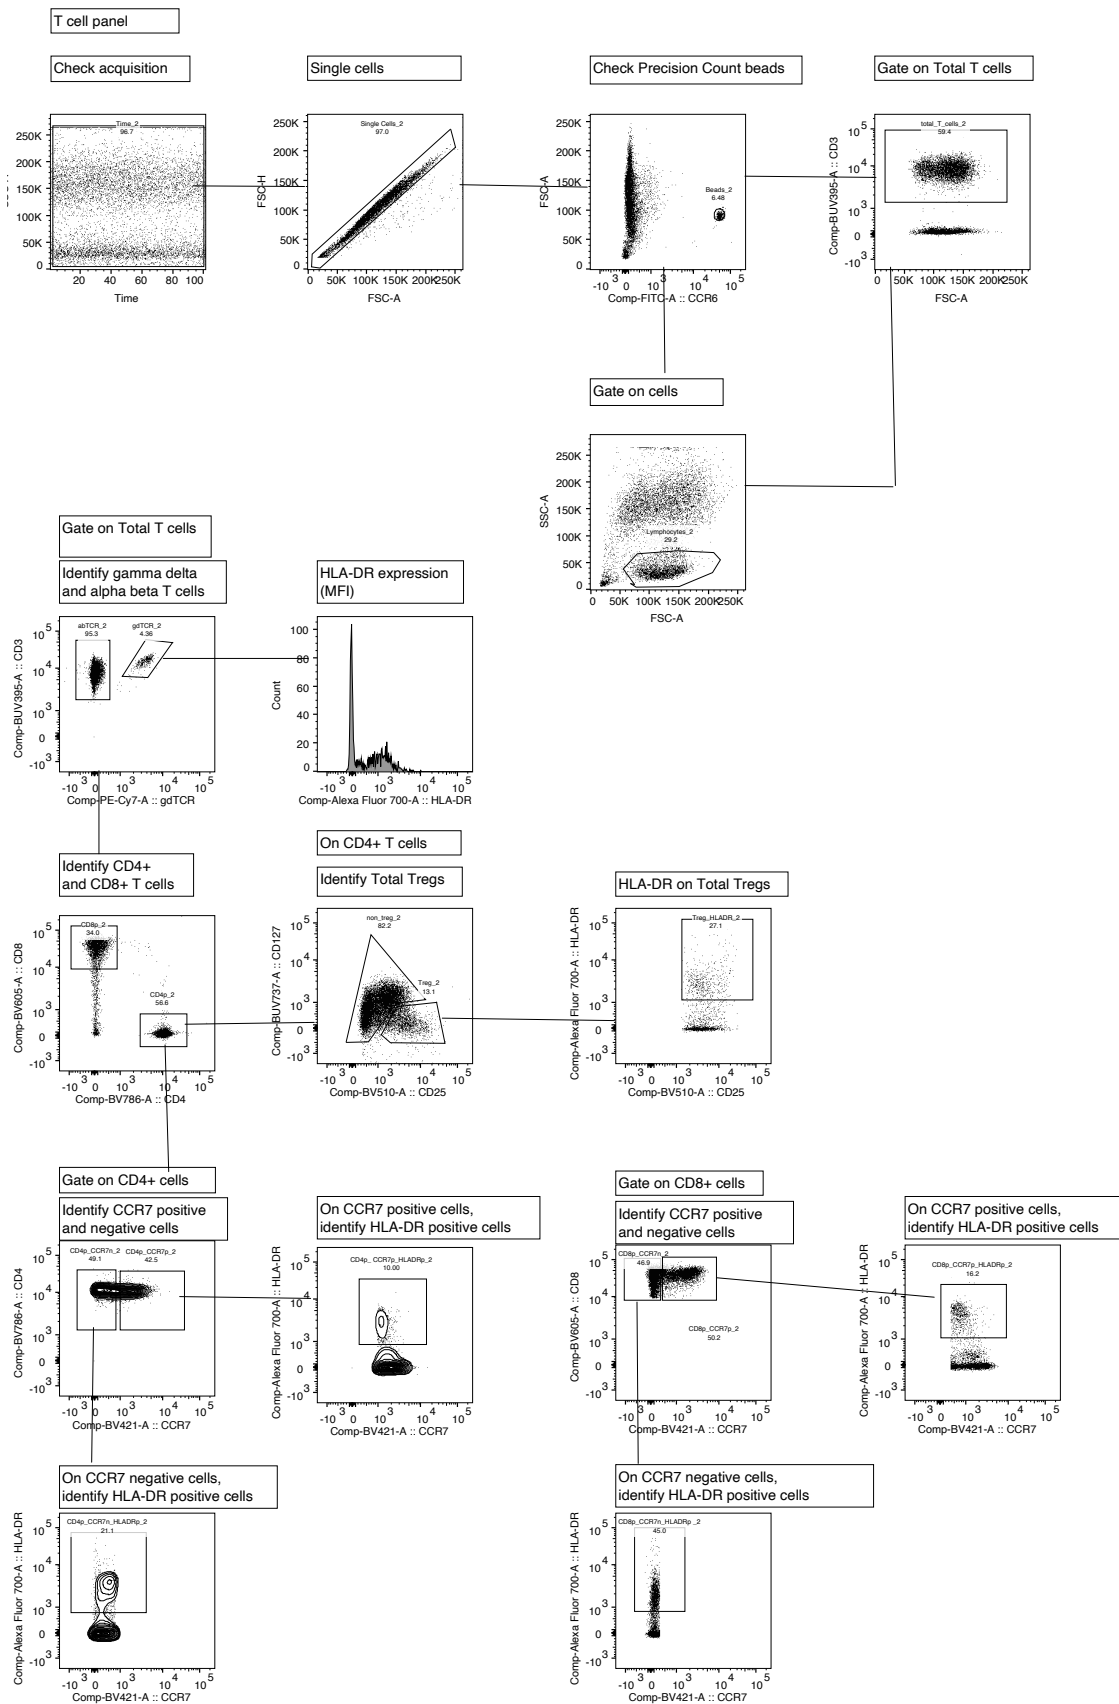

**eFigure-10: B cell panel and gating approach<sup>6</sup>.** Gating strategy used to examine absolute B cell counts in Cytodelics-preserved human whole blood by flow cytometry.

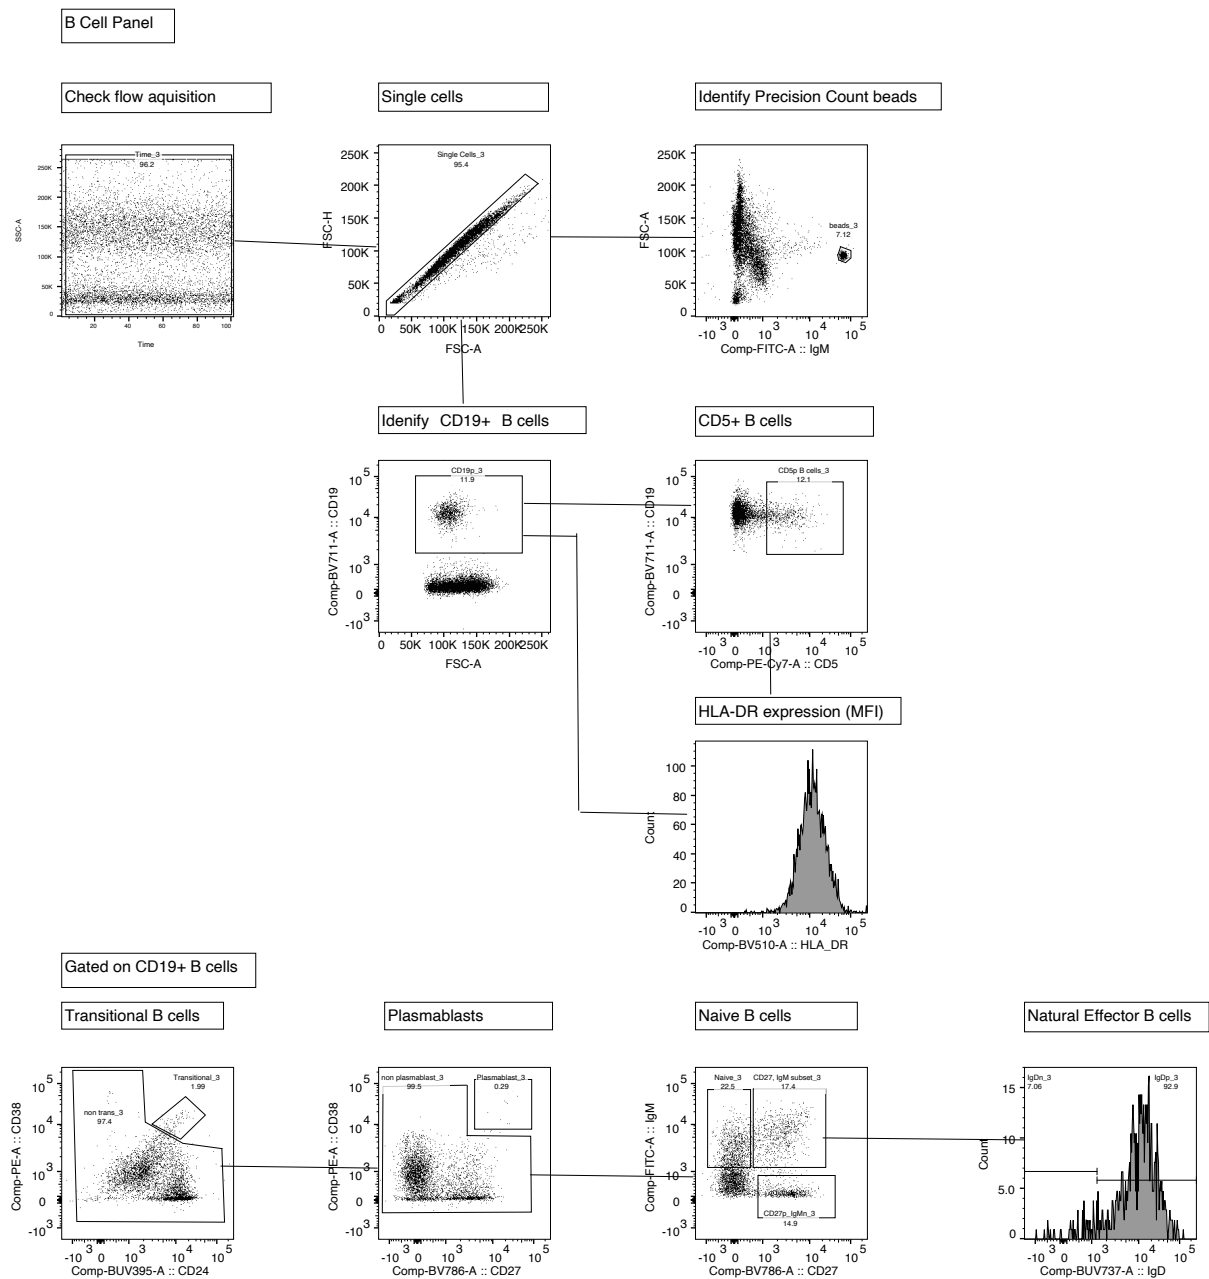

## References

1. Matics, T.J. & Sanchez-Pinto, L.N. Adaptation and Validation of a Pediatric Sequential Organ Failure Assessment Score and Evaluation of the Sepsis-3 Definitions in Critically Ill Children. *JAMA Pediatr* **171**, e172352 (2017).
2. Shime, N., Kageyama, K., Ashida, H. & Tanaka, Y. Application of modified sequential organ failure assessment score in children after cardiac surgery. *J Cardiothorac Vasc Anesth* **15**, 463-468 (2001).
3. Dallaire, F. & Dahdah, N. New equations and a critical appraisal of coronary artery Z scores in healthy children. *J. Am. Soc. Echocardiogr.* **24**, 60-74 (2011).
4. Cherian, T., *et al.* Standardized interpretation of paediatric chest radiographs for the diagnosis of pneumonia in epidemiological studies / Thomas Cherian .... [et al.]. *Interprétation standardisée des radiographies pulmonaires pédiatriques servant au diagnostic de la pneumonie dans les études épidémiologi* (2005).
5. Riphagen, S., Gomez, X., Gonzalez-Martinez, C., Wilkinson, N. & Theocharis, P. Hyperinflammatory shock in children during COVID-19 pandemic. *Lancet* (2020).
6. Maecker, H.T., McCoy, J.P. & Nussenblatt, R. Standardizing immunophenotyping for the Human Immunology Project. *Nat. Rev. Immunol.* **12**, 191-200 (2012).
7. Grehan, K., Ferrara, F. & Temperton, N. An optimised method for the production of MERS-CoV spike expressing viral pseudotypes. *MethodsX* **2**, 379-384 (2015).
8. Verdoni, L., *et al.* An outbreak of severe Kawasaki-like disease at the Italian epicentre of the SARS-CoV-2 epidemic: an observational cohort study. *Lancet* **395**, 1771-1778 (2020).
9. Belhadj, Z., *et al.* Acute heart failure in multisystem inflammatory syndrome in children (MIS-C) in the context of global SARS-CoV-2 pandemic. *Circulation* (2020).
10. Toubiana, J., *et al.* Kawasaki-like multisystem inflammatory syndrome in children during the covid-19 pandemic in Paris, France: prospective observational study. *BMJ* **369**, m2094 (2020).
11. Whittaker, E., *et al.* Clinical Characteristics of 58 Children With a Pediatric Inflammatory Multisystem Syndrome Temporally Associated With SARS-CoV-2. *JAMA* (2020).
12. Kaushik, S., *et al.* Multisystem Inflammatory Syndrome in Children (MIS-C) Associated with SARS-CoV-2 Infection: A Multi-institutional Study from New York City. *J. Pediatr.* (2020).
13. Capone, C.A., *et al.* Characteristics, Cardiac involvement, and Outcomes of Multisystem Inflammatory Disease of Childhood (MIS-C) Associated with SARS-CoV-2 Infection. *J. Pediatr.* (2020).
14. Dufort, E.M., *et al.* Multisystem Inflammatory Syndrome in Children in New York State. *N. Engl. J. Med.* (2020).
15. Feldstein, L.R., *et al.* Multisystem Inflammatory Syndrome in U.S. Children and Adolescents. *N. Engl. J. Med.* (2020).

## **Evelina PIMS TS Working Group Members**

At Evelina London Children's Hospital, London, UK unless specified.

### *Paediatric Immunology and Infectious Diseases*

Julia Kenny, Jenny Handforth, Claire Watterson, Kevin Meesters, Mary-Jo Fogarty, Jonathan Broad, Nuria Martinez-Alier, Alicia Demirjian, Marc Tebruegge, Alejandro Alonso, Tish Shah

### *General Paediatrics*

Marie White, Anna Finemore, Fran Blackburn, Emma Parish, Bianca Tiesman, Ronny Cheung, Nadia Trecchi, John Jackman, Mark Butler, Rohana Ramachandran, Alice Roueche, Chloe Macaulay, Claire Lemer, Felicity Montgomery, Debbie Sobande, Ajanta Kamal

### *Paediatric Rheumatology*

Vinay Shivamurthy, Nick Wilkinson, James Brighthouse

### *Paediatric Pharmacy*

Sara Arenas, Nanna Christiansen, Mandy Wan, Asia Rashed

### *Paediatric Cardiology*

Owen Miller, Sujeev Mathur, James Wong, Paraskevi Theocharis, Kirsty Stewart, Saleha Kabir, Kelly Peacock, Kuberan Pushparajah, Alex Savis, Will Regan, Emma Pascall, Aoife Cleary, Mirasol Uy, Hannah Heard

### *Paediatric Intensive Care Unit and South Thames Retrieval Service*

Michael Carter, Shane Tibby, Jon Lillie, Shelley Riphagen, Marilyn MacDougall, Ben Griffiths, Xabi Gomez, Gareth Waters, Federico Minen, Kenneth MacGruer, Andrew Nyman, Miriam Fine Goulden

### *Paediatric Neurology*

Mario Sa, Ming Lim, Susan Bryne, Jill Cadwgan, JP Lim, Rahul Singh, Shan Tang, Daniel Lumsden

### *Paediatric Nursing*

Sam Senior, Sarah McMurtrie, Emily Foster, Matthew Norridge, Stephanie Emberson, Stacey Marr, Victoria Felton, Shelley Mieres, Arnold Xhikola

### *Paediatric Renal Medicine*

Christopher Reid, Shazia Adalat, Ramnath Balasubramanian, Helen Jones

### *Haematology*

Jay Alamelu, Baba Insua, Jeff Lam Ho Pui, Jo Howard, David Rees, Maria Pelidis (King's College Hospital)

### *Paediatric Endocrinology*

Moir Cheung

### *Paediatric Radiology*

Rui Santos, Haran Jogeesvaran, Heba Elbaaly, Catriona Reid, Dipalee Durve, Shema Hameed

### *Paediatric Dermatology*

Carsten Flohr, Danielle Greenblatt, Cristina Psomadakis, Emma Craythorne

### *Paediatric Surgery*

Vanessa Albert, Iain Yardley, Kirsty Brennan

### *Institute of Women and Child Health, King's Health Partners*

Ingrid Wolfe, Julia Forman, David Edwards

### *Paediatric Oral Medicine and Dental*

Mike Harrison

### *Paediatric Psychiatry and Psychology*

Ben Baig, Deborah Woodman, Harriet Conniff

### *Paediatric Rehabilitation*

Anne Gordon

### *Paediatric Anaesthesia*

Daniel Taylor, Olga van der Woude, Dev Mahtani

### *Department of Infection, Guy's and St Thomas' NHS Foundation Trust*

Jonathan Edgeworth, Gaia Nebbia, Rahul Batra, Suzanne Pickering, Gilberto Betancor, Harry Wilson, Adrian Signell, Rui Pedro Galão
